# Supplementary material for: One-step preparation of reduction-responsive poly(ethylene glycol)-poly(amino acid)s nanogels as efficient intracellular drug delivery platforms
Source: Royal Society of Chemistry journal article supplement (doi:10.1039/c1py00360g), 2011-01-01
Supplement: c1py00360g.pdf [file c1py00360g.pdf]

## Supporting Information

### **One-Step Preparation of Reduction-Responsive Poly(ethylene glycol)-Poly(amino acid)s Nanogels as Efficient Intracellular Drug Delivery Platform**

Jianxun Ding,<sup>‡ac</sup> Fenghua Shi,<sup>‡ab</sup> Chunsheng Xiao,<sup>ac</sup> Lin Lin,<sup>a</sup> Li Chen,<sup>\*b</sup> Chaoliang He,<sup>a</sup> Xiuli Zhuang,<sup>\*a</sup> Xuesi Chen<sup>a</sup>

<sup>a</sup>Key Laboratory of Polymer Ecomaterials, Changchun Institute of Applied Chemistry, Chinese Academy of Sciences, Changchun 130022, P. R. China.

<sup>b</sup>Department of Chemistry, Northeast Normal University, Changchun 130022, P. R. China.

<sup>c</sup>Graduate University of the Chinese Academy of Sciences, Beijing 100039, P. R. China.

<sup>‡</sup>These authors contributed equally to this paper.

Corresponding Author: Li Chen and Xiuli Zhuang

E-mail: chenl686@nenu.edu.cn and zhuangxl@ciac.jl.cn; Tel/Fax: +86-431-85262367.

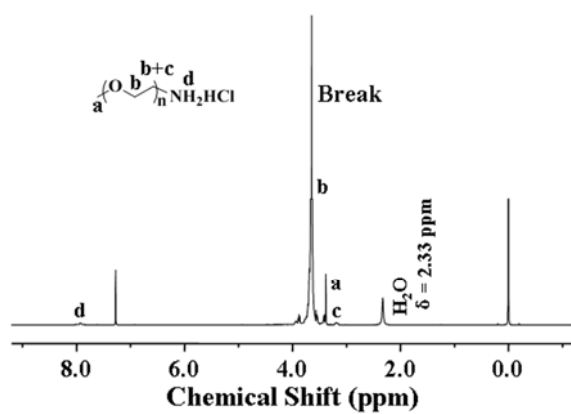

Figure S1.  $^1\text{H}$  NMR spectrum of mPEG-NH<sub>2</sub> (in CDCl<sub>3</sub>).

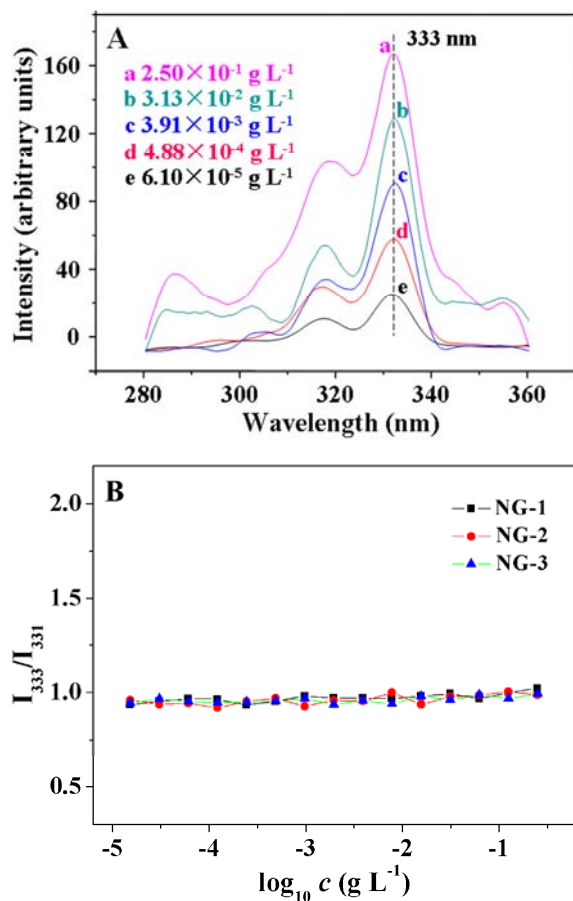

Figure S2. Excitation spectra of pyrene in PBS of NGs at different concentration ( $\lambda_{em} = 390 \text{ nm}$ ) (A), and the intensity ratio ( $I_{333}/I_{331}$ ) as a function of concentration of various NGs (B).
